# Supplementary material for: Melatonin decorated 3D-printed beta-tricalcium phosphate scaffolds promoting bone regeneration in a rat calvarial defect model
Source: Royal Society of Chemistry journal article supplement (doi:10.1039/c8tb03361g), 2019-01-01
Supplement: c8tb03361g1.pdf [file c8tb03361g1.pdf]

## Supporting information

### Melatonin decorated 3D-printed beta-tricalcium phosphate scaffolds promoting bone regeneration in a rat calvarial defect model

Yali Miao,<sup>a, b, †</sup> Yunhua Chen,<sup>a, b, †</sup> Xiao Liu,<sup>c, d</sup> Jingjing Diao,<sup>c, d</sup> Naru Zhao,<sup>a, b\*</sup> Xuetao Shi,<sup>b, c, d</sup> and Yingjun Wang,<sup>b, c, d\*</sup>

<sup>a</sup> School of Materials Science and Engineering, South China University of Technology, Guangzhou 510640, China. E-mail: nrzhao@scut.edu.cn

<sup>b</sup> National Engineering Research Center for Tissue Restoration and Reconstruction, South China University of Technology, Guangzhou 510006, China. E-mail: imwangyj@163.com

<sup>c</sup> Key Laboratory of Biomedical Engineering of Guangdong Province, and Innovation Center for Tissue Restoration and Reconstruction, South China University of Technology, Guangzhou 510006, China

<sup>d</sup> Key Laboratory of Biomedical Materials and Engineering of the Ministry of Education, South China University of Technology, Guangzhou 510006, China

<sup>†</sup> These authors contributed equally

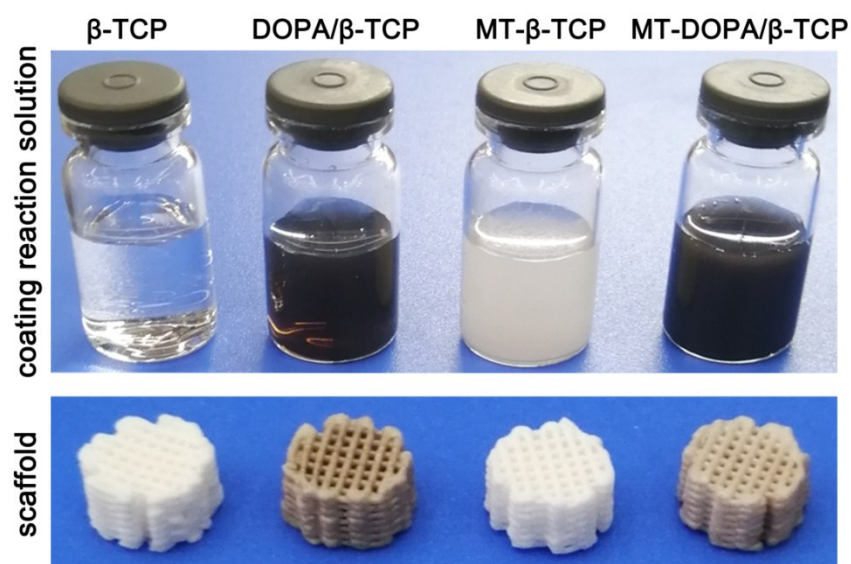

**Fig. S1** The coating solution for TCP scaffolds and the appearance of obtained scaffolds after decorated with MT and/or DOPA.

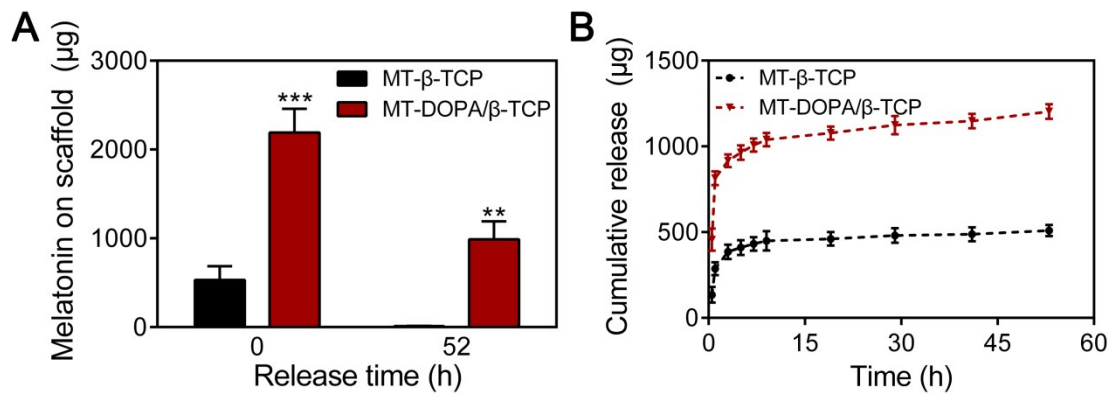

**Fig. S2** (A) HPLC quantitative analysis of the total amount of MT loaded on the scaffolds and the residual amount of melatonin on the surface of the scaffolds after 52 h release. (B) The absolute value of melatonin release from scaffolds was characterized by HPLC.

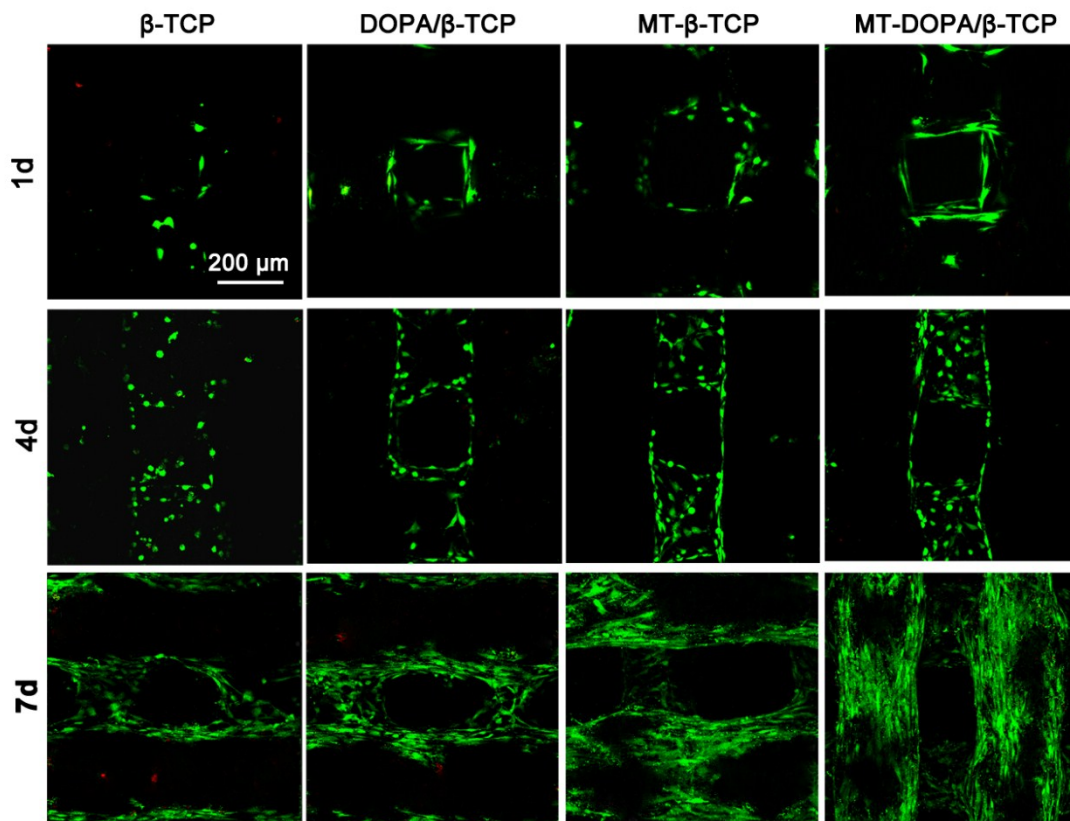

**Fig. S3** Enlarged confocal fluorescence images of mBMSCs cells on scaffolds by staining with calcein AM (live cells, green fluorescence) and PI (dead cells, red fluorescence).

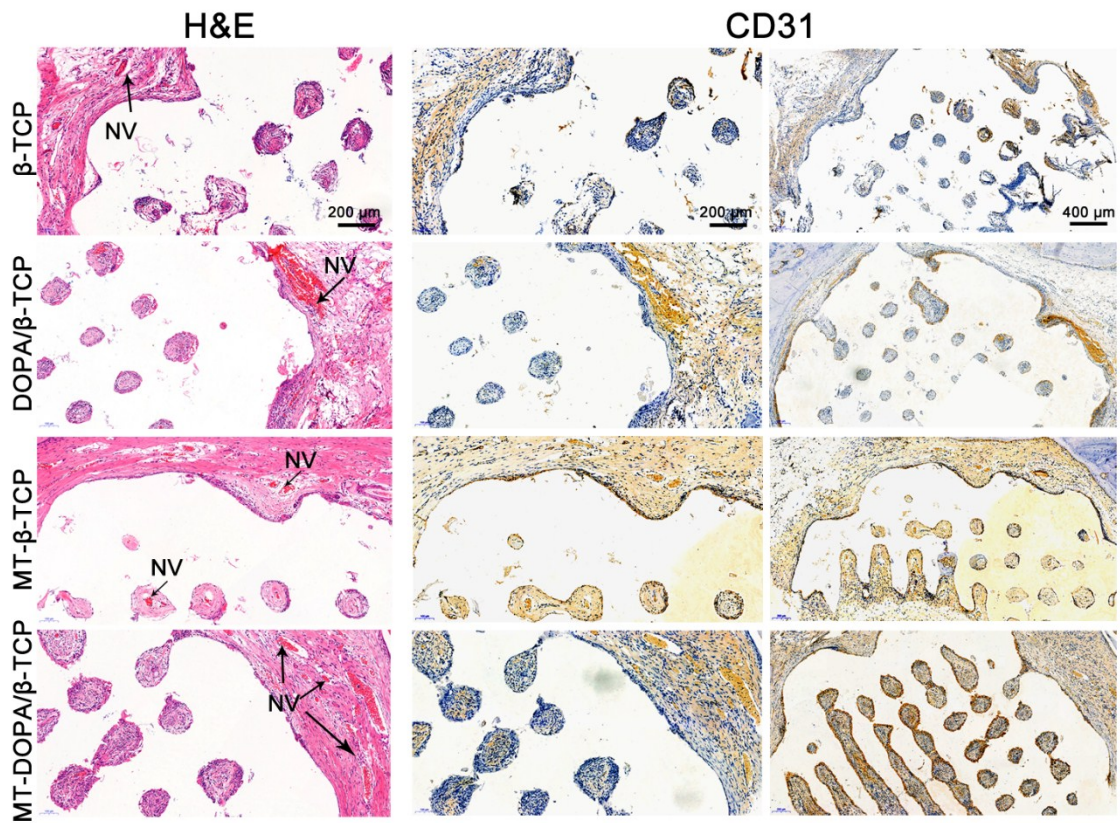

**Fig. S4** H&E staining and CD31 immunohistochemical staining images of the scaffold-filled areas at week 8 after implantation. NV represents for new vessel.
